# Supplementary material
Source: MDPI journal article supplement (https://www.mdpi.com/2077-0472/13/10/2038)
Supplement: s1 [file s1]

Supplementary Table 1. Soil chemical properties before and after Italian ryegrass cultivation in three years

|           |            | Exchangeable cations |                       |                                   |                           |     |     |                    |
|-----------|------------|----------------------|-----------------------|-----------------------------------|---------------------------|-----|-----|--------------------|
| Treatment |            | pH                   | OM                    | Av. P <sub>2</sub> O <sub>5</sub> | K                         | Ca  | Mg  | EC                 |
|           |            | (1:5)                | (g kg <sup>-1</sup> ) | (mg kg <sup>-1</sup> )            | (cmol+ kg <sup>-1</sup> ) |     |     | dS m <sup>-1</sup> |
| 2019–     | Before IRG | 6.5                  | 11                    | 94                                | 0.3                       | 4.1 | 0.5 | 0.2                |
| 2020      | After IRG  | 6.4                  | 10.9                  | 112.8                             | 0.3                       | 4.9 | 0.6 | 0.4                |
| 2020–     | Before IRG | 6.5                  | 8.7                   | 221                               | 0.2                       | 4.3 | 0.5 | 0.1                |
| 2021      | After IRG  | 6.7                  | 10.7                  | 98                                | 0.2                       | 5.8 | 0.5 | 0.1                |
| 2021–     | Before IRG | 6.6                  | 9.5                   | 100                               | 0.2                       | 3.4 | 0.3 | 0.2                |
| 2022      | After IRG  | 6.0                  | 8.6                   | 102                               | 0.3                       | 4.2 | 0.6 | 0.1                |
